# Supplementary material for: Salvage versus Primary Liver Transplantation for Hepatocellular Carcinoma: A Twenty-Year Experience Meta-Analysis
Source: MDPI journal article supplement (doi:10.3390/cancers14143465), 2022-07-16
Supplement: s1 [file s1]

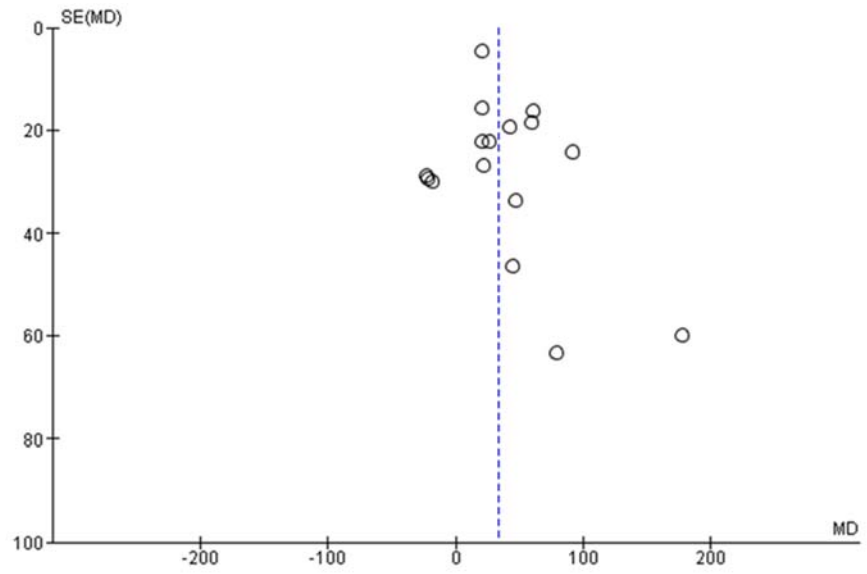

**Figure S1.** - Operating time.

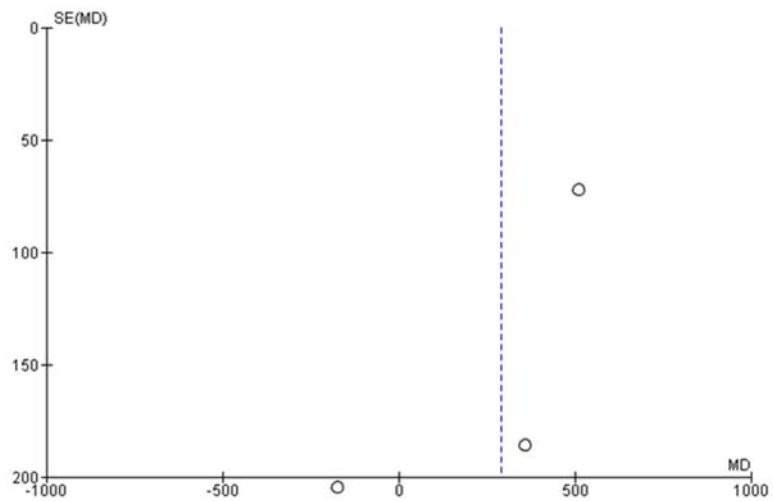

**Figure S2.** - Intraoperative blood loss .

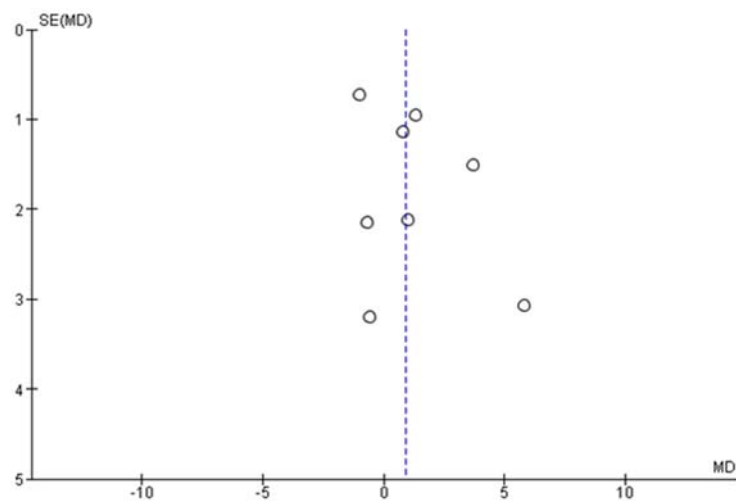

**Figure S3.** - Intraoperative Red Blood Cell (RBC) transfusion.

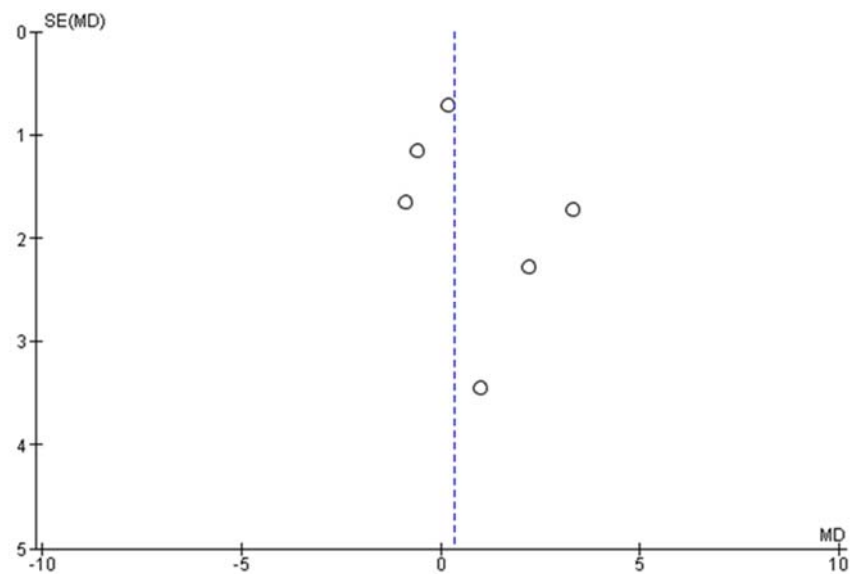

**Figure S4** - Fresh frozen plasma (FFP) transfusion.

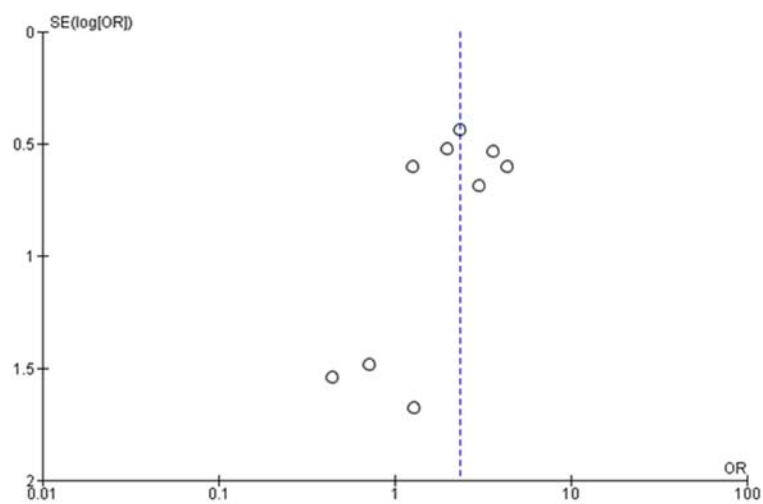

**Figure S5**. - Reoperation rate.

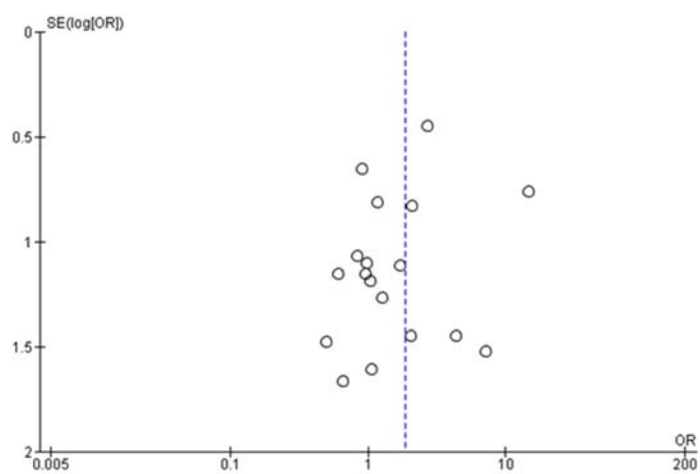

**Figure S6**. - Perioperative mortality rate .

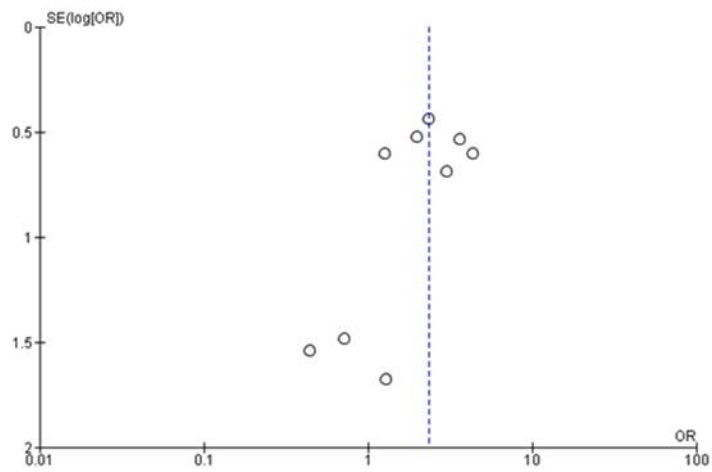

**Figure S7.** - Re-transplantation rate.

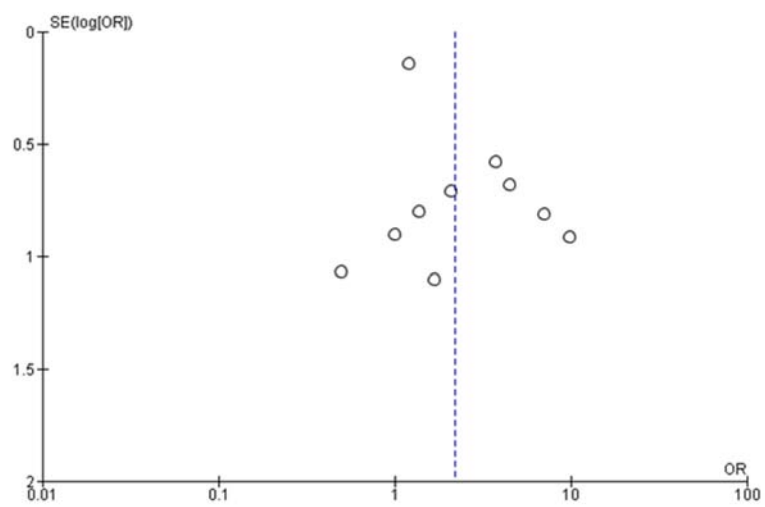

**Figure S8.** - Postoperative bleeding .

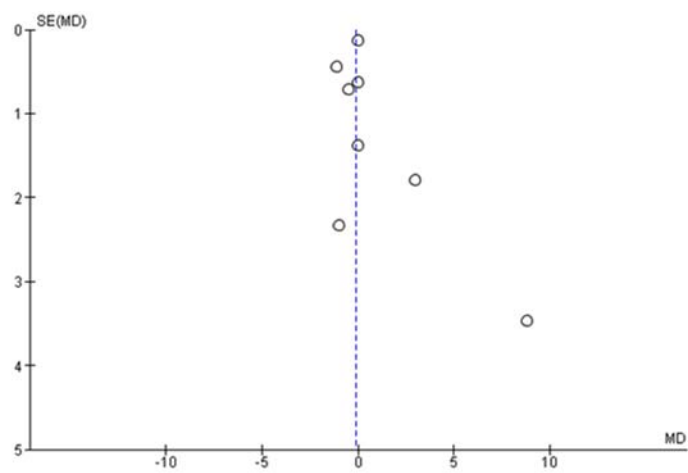

**Figure S9.** - Intensive Care Unit stay.

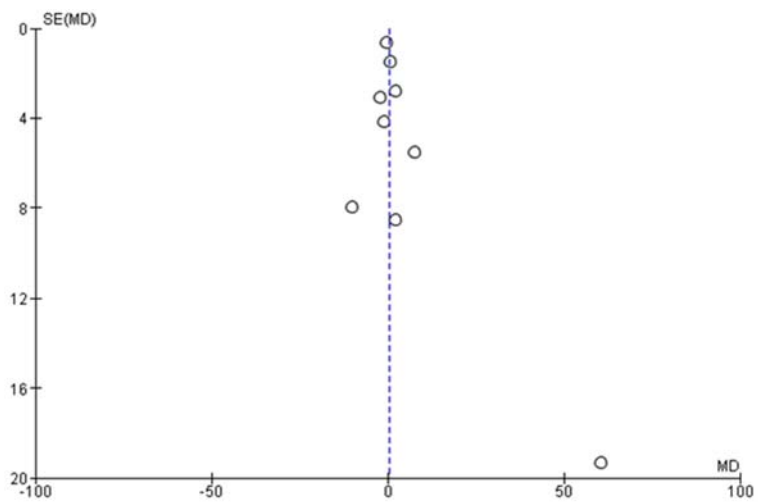

**Figure S10.** - Length of Hospital stay .

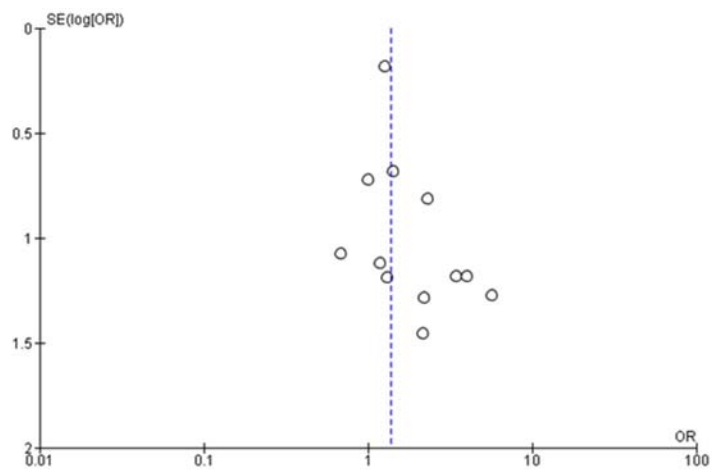

**Figure S11.** - Overall vascular complication.

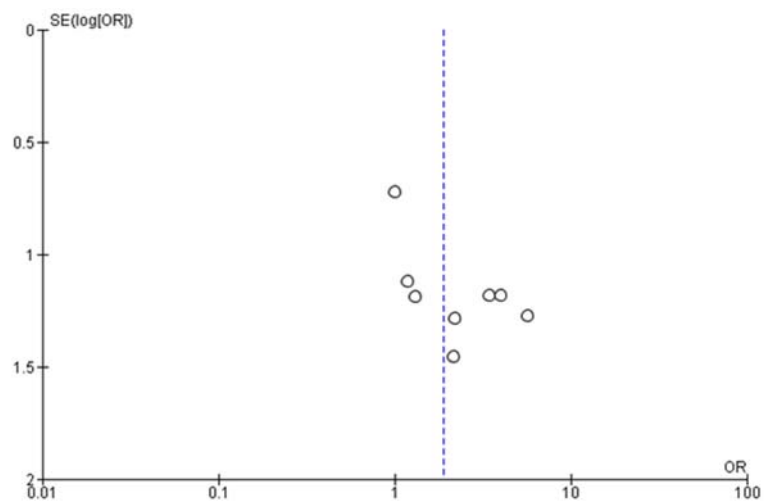

**Figure S12.** - Arterial thrombosis.

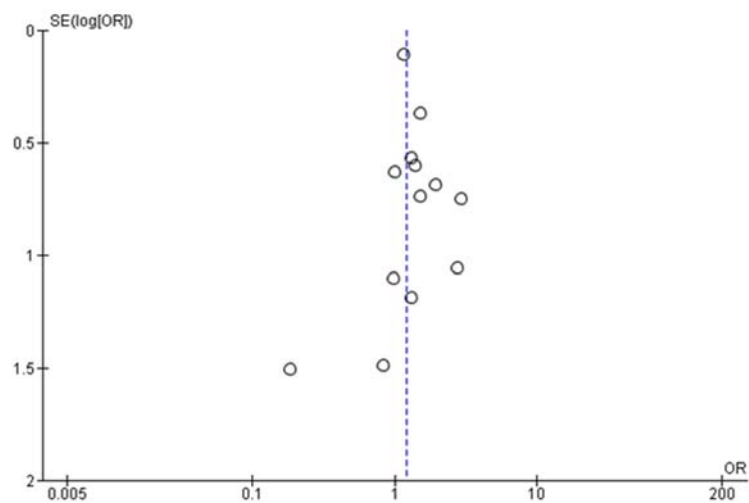

**Figure S13.** - Biliary complication.

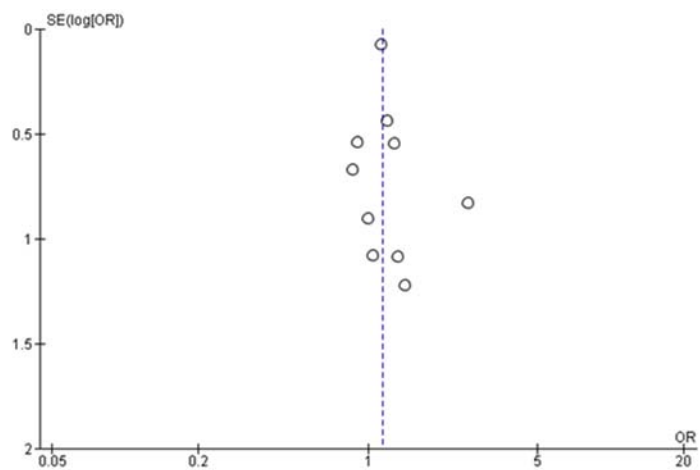

**Figure S14.** - Infection and sepsis .

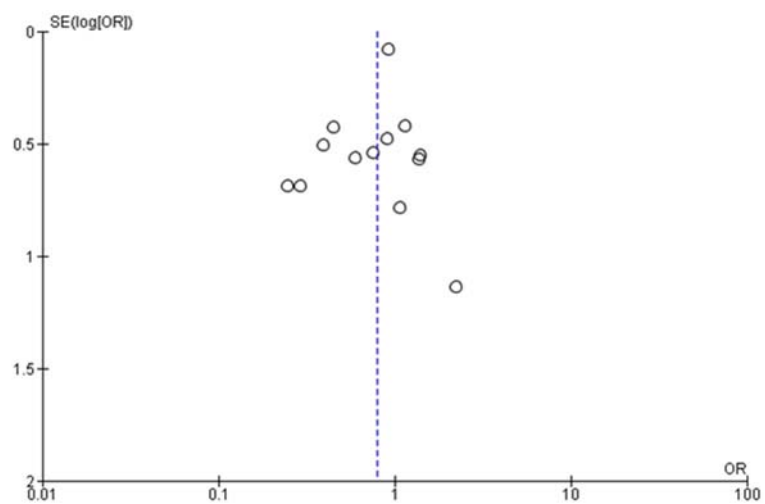

**Figure S15.** - 1y-Overall survival rates.

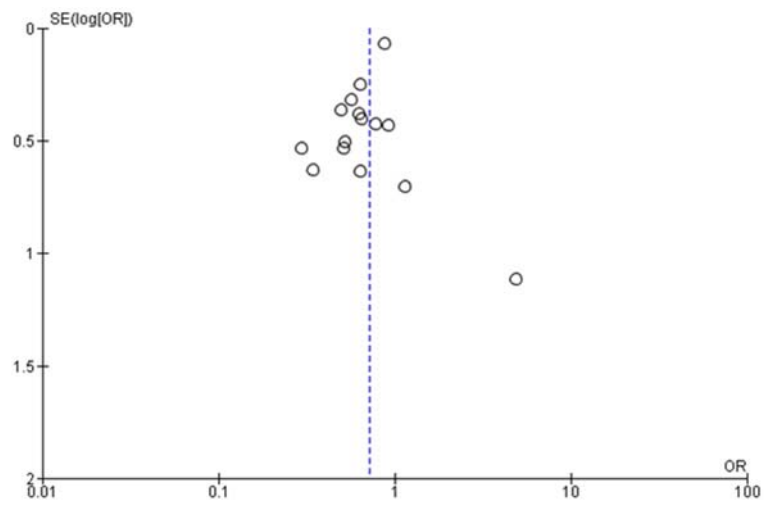

**Figure S16.** - 3y-Overall survival rates.

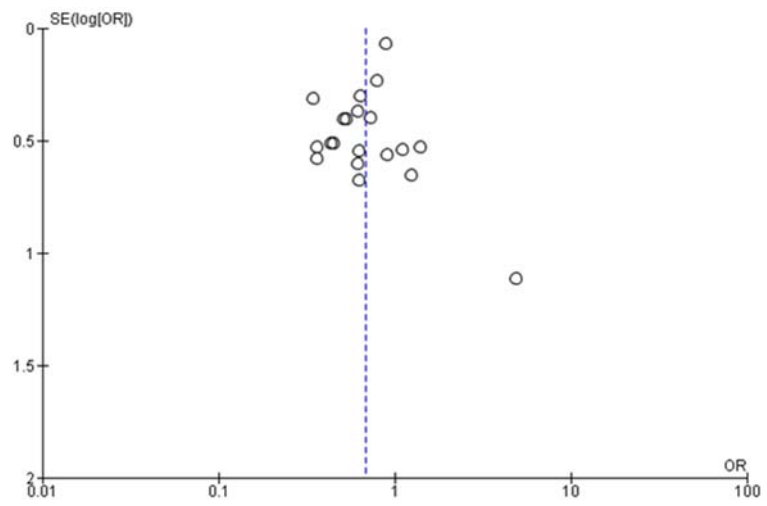

**Figure S17.** - 5y-Overall survival rates.

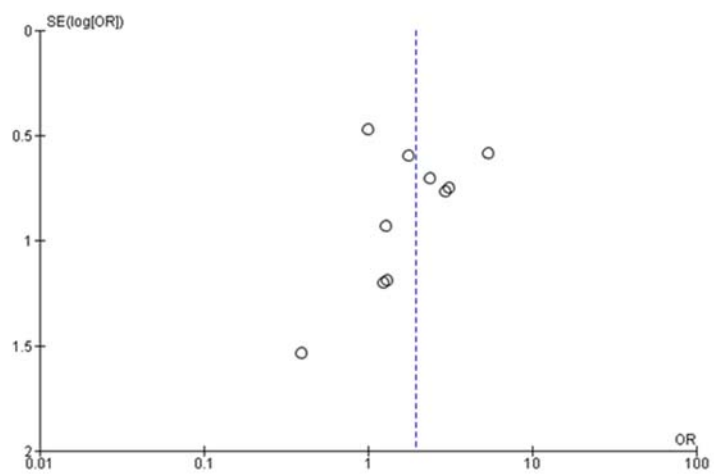

**Figure S18.** - HCC recurrence rate.

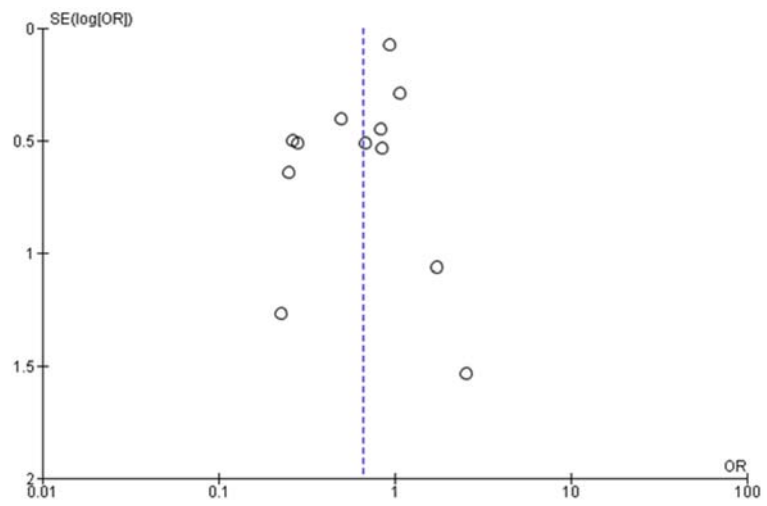

**Figure S19.** - 1y-Disease free survival rates.

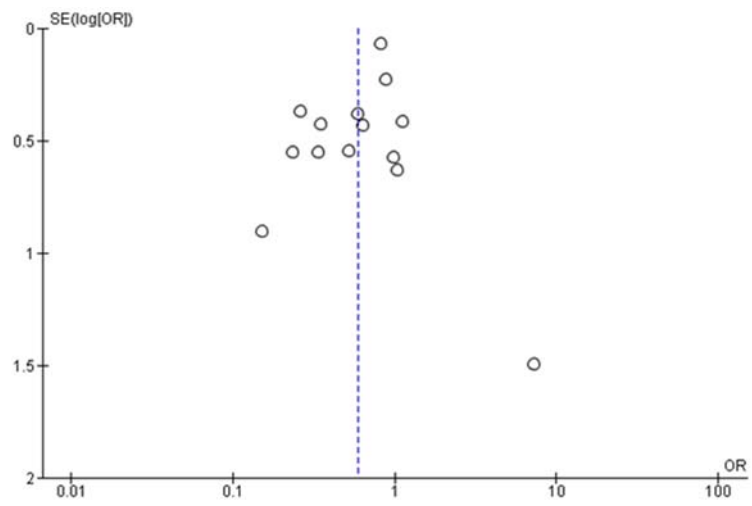

**Figure S20.** - 3y-Disease free survival rates.

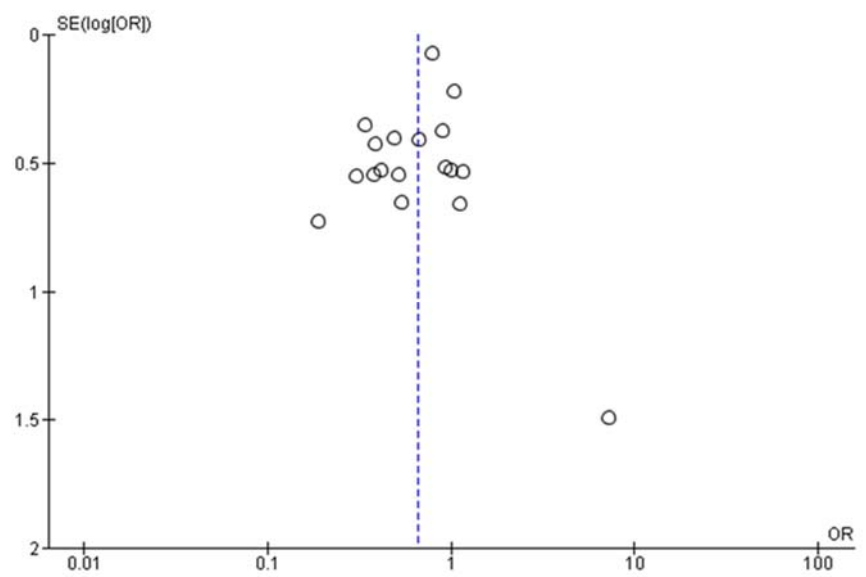

**Figure S21.** - 5y-Disease free survival rates.
