# Supplementary material for: Salvage versus Primary Liver Transplantation for Hepatocellular Carcinoma: A Twenty-Year Experience Meta-Analysis
Source: Cancers (Basel). 2022 Jul 16;14(14):3465. doi: 10.3390/cancers14143465 (PMC9320001; doi:10.3390/cancers14143465)
Supplement: Supplementary file 1 [file cancers-14-03465-s001.zip › Supplementary File S2.csv]

Search number	Query	Sort By	Filters	Search Details	Results	Time
6	(((living donor liver transplantation) or (liver transplantation)) or (salvage liver transplantation)) and (HCC)			((("living donors"[MeSH Terms] OR ("living"[All Fields] AND "donors"[All Fields]) OR "living donors"[All Fields] OR ("living"[All Fields] AND "donor"[All Fields]) OR "living donor"[All Fields]) AND ("liver transplantation"[MeSH Terms] OR ("liver"[All Fields] AND "transplantation"[All Fields]) OR "liver transplantation"[All Fields])) OR ("liver transplantation"[MeSH Terms] OR ("liver"[All Fields] …	7,977	10:40:42
1	salvage liver transplantation			("salvage therapy"[MeSH Terms] OR ("salvage"[All Fields] AND "therapy"[All Fields]) OR "salvage therapy"[All Fields] OR "salvage"[All Fields] OR "salvageability"[All Fields] OR "salvageable"[All Fields] OR "salvaged"[All Fields] OR "salvages"[All Fields] OR "salvaging"[All Fields]) AND ("liver transplantation"[MeSH Terms] OR ("liver"[All Fields] AND "transplantation"[All Fields]) OR "liver transp…	860	10:39:28
4	living donor liver transplantation			("living donors"[MeSH Terms] OR ("living"[All Fields] AND "donors"[All Fields]) OR "living donors"[All Fields] OR ("living"[All Fields] AND "donor"[All Fields]) OR "living donor"[All Fields]) AND ("liver transplantation"[MeSH Terms] OR ("liver"[All Fields] AND "transplantation"[All Fields]) OR "liver transplantation"[All Fields])	10,308	10:27:41
3	liver transplantation			"liver transplantation"[MeSH Terms] OR ("liver"[All Fields] AND "transplantation"[All Fields]) OR "liver transplantation"[All Fields]	116,608	10:26:55
2	HCC			"HCC"[All Fields]	63,900	10:26:19
